# Supplementary material for: Cost-effectiveness analysis and budget impact of rivaroxaban compared with dalteparin in patients with cancer at risk of recurrent venous thromboembolism
Source: PubMed Central journal article supplement (PMC7678368; doi:10.1136/bmjopen-2020-039057), 2020-11-19
Supplement: bmjopen-2020-039057supp001.pdf [file bmjopen-2020-039057supp001.pdf]

## Supplementary data file – Table S1

**Manuscript title:** Cost-effectiveness analysis and budget impact of rivaroxaban in cancer patients at risk of recurrent venous thromboembolism

Table S1. Transition probabilities used in the cost-effectiveness model

|                                                                                                  | Rivaroxaban (95% CI)                | LMWH (95% CI)         | Distribution | Reference |
|--------------------------------------------------------------------------------------------------|-------------------------------------|-----------------------|--------------|-----------|
| <b>Recurrent VTE</b>                                                                             |                                     |                       |              |           |
| 0–6 months                                                                                       | 0.040 (0.020 – 0.090)               | 0.110 (0.070 – 0.160) | Beta         | [1]       |
| 6–12 months                                                                                      | 0.040 (0.031 – 0.050)               |                       | Beta         | [2]       |
| 1–2 years                                                                                        | 0.034 (0.027 – 0.042)               |                       | Beta         | [2]       |
| 2–3 years                                                                                        | 0.021 (0.014 – 0.029)               |                       | Beta         | [2]       |
| 3–4 years                                                                                        | 0.016 (0.009 – 0.026)               |                       | Beta         | [2]       |
| 4–5 months                                                                                       | 0.013 (0.006 – 0.024)               |                       | Beta         | [2]       |
| <b>Type of recurrent VTE</b>                                                                     |                                     |                       |              |           |
| Symptomatic PE                                                                                   | 17.4% ( $\alpha = 4, \beta = 19$ )  |                       | Dirichlet    | [1]       |
| Incidental PE                                                                                    | 30.4% ( $\alpha = 7, \beta = 16$ )  |                       | Dirichlet    | [1]       |
| DVT                                                                                              | 43.5% ( $\alpha = 10, \beta = 13$ ) |                       | Dirichlet    | [1]       |
| Fatal PE                                                                                         | 8.7% ( $\alpha = 2, \beta = 21$ )   |                       | Dirichlet    | [1]       |
| <b>MB</b>                                                                                        |                                     |                       |              |           |
| 0–6 months                                                                                       | 0.060 (0.030 – 0.110)               | 0.040 (0.020 – 0.080) | Beta         | [1]       |
| Beyond 6 months treatment                                                                        | 0.008 (0.006 – 0.010)               |                       | Beta         | [3]       |
| <b>Type of MB</b>                                                                                |                                     |                       |              |           |
| ICH                                                                                              | 10% ( $\alpha = 5, \beta = 45$ )    |                       | Dirichlet    | [3]       |
| Non-ICH MB                                                                                       | 86% ( $\alpha = 43, \beta = 7$ )    |                       | Dirichlet    | [3]       |
| Fatal MB                                                                                         | 4% ( $\alpha = 2, \beta = 48$ )     |                       | Dirichlet    | [3]       |
| <b>CRNMB</b>                                                                                     |                                     |                       |              |           |
| 0–6 months                                                                                       | 0.130 (0.090 – 0.190)               | 0.040 (0.020 – 0.090) | Beta         | [1]       |
| Beyond 6 months treatment                                                                        | 0.008 (0.006 – 0.010)               |                       | Beta         | [3]       |
| <b>PTS</b>                                                                                       |                                     |                       |              |           |
| 0–6 months                                                                                       | 0.015 (0.011 – 0.019)               |                       | Beta         | [4]       |
| 6–12 months                                                                                      | 0.012 (0.009 – 0.015)               |                       | Beta         | [4]       |
| 12–18 months                                                                                     | 0.008 (0.006 – 0.010)               |                       | Beta         | [4]       |
| 18–24 months                                                                                     | 0.025 (0.023 – 0.019)               |                       | Beta         | [4]       |
| 24–30 months                                                                                     | 0.011 (0.008 – 0.014)               |                       | Beta         | [4]       |
| 30–36 months                                                                                     | 0.006 (0.005 – 0.008)               |                       | Beta         | [4]       |
| 3–4 years                                                                                        | 0.001 (0.0008 – 0.0013)             |                       | Beta         | [4]       |
| 4–5 years                                                                                        | 0.001 (0.0008 – 0.0013)             |                       | Beta         | [4]       |
| CTEPH (annual risk)                                                                              | 0.0057 (0.0002 – 0.012)             |                       | Beta         | [5]       |
| <b>Mortality (annual risk)</b>                                                                   |                                     |                       |              |           |
| 0–1 years                                                                                        | 0.230 (0.200 – 0.390)               |                       | Beta         | [6]       |
| 1–2 years                                                                                        | 0.104 (0.088 – 0.180)               |                       | Beta         | [6]       |
| 2–3 years                                                                                        | 0.058 (0.055 – 0.120)               |                       | Beta         | [6]       |
| 3–4 years                                                                                        | 0.046 (0.043 – 0.068)               |                       | Beta         | [6]       |
| 4–5 years                                                                                        | 0.032 (0.030 – 0.073)               |                       | Beta         | [6]       |
| <b>Relative risk of recurrent VTE, MB, and CRNMB for LMWH versus placebo, used in scenario 5</b> |                                     |                       |              |           |
| Recurrent VTE (any)                                                                              | 5.170                               |                       | Fixed        | [7]       |
| MB                                                                                               | 0.242                               |                       | Fixed        | [7]       |
| CRNMB                                                                                            | 1.000                               |                       | Fixed        | [7]       |

| Drug-specific distribution of the type of VTE, used in scenario 6 |                                    |                                    |           |     |
|-------------------------------------------------------------------|------------------------------------|------------------------------------|-----------|-----|
| <i>Symptomatic PE</i>                                             | 28.6% ( $\alpha = 2, \beta = 5$ )  | 12.5% ( $\alpha = 2, \beta = 14$ ) | Dirichlet | [1] |
| <i>Incidental PE</i>                                              | 14.3% ( $\alpha = 1, \beta = 6$ )  | 37.5% ( $\alpha = 6, \beta = 10$ ) | Dirichlet | [1] |
| <i>DVT</i>                                                        | 42.9% ( $\alpha = 3, \beta = 4$ )  | 43.8% ( $\alpha = 7, \beta = 9$ )  | Dirichlet | [1] |
| <i>Fatal PE</i>                                                   | 14.3% ( $\alpha = 1, \beta = 6$ )  | 6.3% ( $\alpha = 1, \beta = 15$ )  | Dirichlet | [1] |
| Drug-specific distribution of the type of MB, used in scenario 6  |                                    |                                    |           |     |
| <i>ICH</i>                                                        | 6.1% ( $\alpha = 2, \beta = 31$ )  | 17.6% ( $\alpha = 3, \beta = 14$ ) | Dirichlet | [3] |
| <i>Non-ICH MB</i>                                                 | 93.9% ( $\alpha = 31, \beta = 2$ ) | 70.6% ( $\alpha = 12, \beta = 5$ ) | Dirichlet | [3] |
| <i>Fatal MB</i>                                                   | 0% ( $\alpha = 0, \beta = 33$ )    | 11.8% ( $\alpha = 2, \beta = 15$ ) | Dirichlet | [3] |

Abbreviations: CI, confidence interval; CRNMB, clinically relevant non-major bleeding; CTEPH, chronic thromboembolic pulmonary hypertension; DVT, deep vein thrombosis; ICH, intracranial haemorrhage; LMWH, low-molecular weight heparin; MB, major bleeding; PE, pulmonary embolism; PTS, post-thrombotic syndrome; SE, standard error; VTE, venous thromboembolism

## References

1. Young AM, Marshall A, Thirlwall J, Chapman O, Lokare A, Hill C, et al. Comparison of an Oral Factor Xa Inhibitor With Low Molecular Weight Heparin in Patients With Cancer With Venous Thromboembolism: Results of a Randomized Trial (SELECT-D). *J Clin Oncol*. 2018;36(20):2017–23.
2. Cohen AT, Katholing A, Rietbrock S, Bamber L, Martinez C. Epidemiology of first and recurrent venous thromboembolism in patients with active cancer. *Thromb Haemost*. 2017;117(01):57–65.
3. Raskob GE, van Es N, Verhamme P, Carrier M, Di Nisio M, Garcia D, et al. Edoxaban for the Treatment of Cancer-Associated Venous Thromboembolism. *N Engl J Med*. 2018;378(7):615–24.
4. Prandoni P, Villalta S, Bagatella P, Rossi L, Marchiori A, Piccioli A, et al. The clinical course of deep-vein thrombosis. Prospective long-term follow-up of 528 symptomatic patients. *Haematologica*. 1997;82(4):423–8.
5. Klok FA, van Kralingen KW, van Dijk APJ, Heyning FH, Vliegen HW, Huisman M V. Prospective cardiopulmonary screening program to detect chronic thromboembolic pulmonary hypertension in patients after acute pulmonary embolism. *Haematologica*. 2010;95(6):970–5.
6. The Netherlands Cancer Registry. Survival statistics - all tumours 1961-2015 [Internet].
7. Napolitano M, Saccullo G, Malato A, Sprini D, Ageno W, Imberti D, et al. Optimal duration of low molecular weight heparin for the treatment of cancer-related deep vein thrombosis: the Cancer-DACUS Study. *J Clin Oncol*. 2014;32(32):3607–12.

## Supplementary data file – Table S2

**Manuscript title:** Cost-effectiveness analysis and budget impact of rivaroxaban in cancer patients at risk of recurrent venous thromboembolism

Table S2. Costs included in the cost-effectiveness model (Euros, 2019)

|                                                 | Value (95% CI)              | Distribution | Reference  |
|-------------------------------------------------|-----------------------------|--------------|------------|
| <b>Event costs</b>                              |                             |              |            |
| Recurrent VTE                                   |                             |              |            |
| Symptomatic PE                                  | €4,717 (€2,364 – €7,868)    | Gamma        | [1]        |
| Incidental PE                                   | €0                          | Fixed        | Assumption |
| DVT                                             | €663 (€464 – €862)          | Gamma        | [1]        |
| Fatal recurrent VTE <sup>a</sup>                | €4,717 (€2,364 – €7,868)    | Gamma        | [1]        |
| ICH acute care costs                            | €22,769 (€11,644 – €31,175) | Gamma        | [2]        |
| ICH long-term costs (monthly)                   | €637 (€319 – €1,063)        | Gamma        | [1]        |
| Non-ICH MB                                      | €10,685 (€5,356 – €17,824)  | Gamma        | [1]        |
| Fatal MB                                        | €10,685 (€5,356 – €17,824)  | Gamma        | [1]        |
| CRNMB                                           | €274 (€137 – €457)          | Gamma        | [1]        |
| PTS                                             | €1,431 (€717 – €2,387)      | Gamma        | [1]        |
| CTEPH acute care costs                          | €7,843 (€3,931 – €16,433)   | Gamma        | [1]        |
| CTEPH long-term costs (monthly)                 | €89 (€45 – €149)            | Gamma        | [1]        |
| <b>Treatment costs</b>                          |                             |              |            |
| Drug cost (daily)                               |                             |              |            |
| LMWH <sup>b</sup>                               | €9.93                       | Fixed        | [3]        |
| Rivaroxaban 15 mg                               | €4.58                       | Fixed        | [3]        |
| Rivaroxaban 20 mg                               | €2.29                       | Fixed        | [3]        |
| Treatment duration (days)                       |                             |              |            |
| LMWH                                            | 183 (137 – 228)             | Gamma        | [4]        |
| Rivaroxaban 15 mg                               | 21 (16 – 26)                | Gamma        | [4]        |
| Rivaroxaban 20 mg                               | 162 (121 – 202)             | Gamma        | [4]        |
| LMWH administration costs                       |                             |              |            |
| Costs for home caregiver (per hour)             | €59.34 (€44.51 – €74.18)    | Gamma        | [5]        |
| Duration of at home administration (hour)       | 0.25 (0.19 – 0.31)          | Gamma        | Assumption |
| Hospitalisation duration PE (days) <sup>c</sup> | 6.6 (5.0 – 8.3)             | Gamma        | [6]        |
| Renal monitoring <sup>c</sup>                   | €1.64 (€1.23 – €2.05)       | Gamma        | [7]        |
| <b>Indirect costs</b>                           |                             |              |            |
| Travel costs                                    |                             |              |            |
| Cost per km                                     | €0.20 (€0.15 – €0.25)       | Gamma        | [8]        |
| Distance to hospital (km)                       | 7                           | Fixed        | [8]        |
| Distance to GP (km)                             | 1.1                         | Fixed        | [8]        |
| Informal care costs                             |                             |              |            |
| PE                                              | €1,515 (€1,136 – €1,894)    | Gamma        | [5,9]      |
| DVT                                             | €233 (€175 – €291)          | Gamma        | [5,9]      |
| ICH (acute informal care costs)                 | €1,515 (€1,136 – €1,894)    | Gamma        | [5,9]      |
| ICH (long-term informal care costs, monthly)    | €626 (€470 – €783)          | Gamma        | [10]       |
| Non-ICH MB                                      | €758 (€568 – €947)          | Gamma        | [5,9]      |
| CRNMB                                           | €117 (€87 – €146)           | Gamma        | [5,9]      |

Abbreviations: CI, confidence interval; CRNMB, clinically relevant non-major bleeding; CTEPH, chronic thromboembolic pulmonary hypertension; DVT, deep vein thrombosis; GP, general practitioner; ICH, intracranial haemorrhage; LMWH, low-molecular weight heparin; MB, major bleeding; PE, pulmonary embolism; PTS, post-thrombotic syndrome; VTE, venous thromboembolism

<sup>a</sup> Assumed to be equal to the costs of non-fatal PE

<sup>b</sup>Based on an average weight between 69 and 82 kg.

<sup>c</sup>Based on DRG code 070419 and only taken into account for rivaroxaban treated patients

## References

1. Heisen M, Treur MJ, Heemstra HE, Giesen EBW, Postma MJ. Cost-effectiveness analysis of rivaroxaban for treatment and secondary prevention of venous thromboembolism in the Netherlands. *J Med Econ*. 2017 Aug 3;20(8):813–24.
2. Baeten S a, van Exel NJ a, Dirks M, Koopmanschap M a, Dippel DW, Niessen LW. Lifetime health effects and medical costs of integrated stroke services - a non-randomized controlled cluster-trial based life table approach. *Cost Eff Resour Alloc*. 2010;8(1):21.
3. Medicijnkosten.nl. The National Health Care Institute (ZIN) [Internet].
4. Young AM, Marshall A, Thirlwall J, Chapman O, Lokare A, Hill C, et al. Comparison of an Oral Factor Xa Inhibitor With Low Molecular Weight Heparin in Patients With Cancer With Venous Thromboembolism: Results of a Randomized Trial (SELECT-D). *J Clin Oncol*. 2018;36(20):2017–23.
5. Hakkaart-van Roijen L, van der Linden N, Bouwmans C, Kanters T, Swan Tan S. Kostenhandleiding: Methodologie van kostenonderzoek en referentieprijzen voor economische evaluaties in de gezondheidszorg. Zorginstituut Ned. 2016;1–120.
6. van Bellen B, Bamber L, Correa de Carvalho F, Prins M, Wang M, Lensing AWA. Reduction in the length of stay with rivaroxaban as a single-drug regimen for the treatment of deep vein thrombosis and pulmonary embolism. *Curr Med Res Opin*. 2014;30(5):829–37.
7. Dutch Health Authorities. NZa zorgproductapplicatie. Declaration code: 070419. [Internet]. 2018.
8. Roijen LH, Linden N van der, Bouwmans C, Kanters T, Tan SS. Dutch manual for costing studies in health care. Diemen; 2015.
9. de Klerk M, de Boer A, Plaisier I, Schyns P, Kooiker S. Informele hulp: wie doet er wat? - Rapport - SCP [Internet]. 2015-35. 2015.
10. van den Berg B, Brouwer W, van Exel J, Koopmanschap M, van den Bos GAM, Rutten F. Economic valuation of informal care: lessons from the application of the opportunity costs and proxy good methods. *Soc Sci Med*. 2006;62(4):835–45.

## Supplementary data file – Table S3

**Manuscript title:** Cost-effectiveness analysis and budget impact of rivaroxaban in cancer patients at risk of recurrent venous thromboembolism

Table S3. Utility values included in the cost-effectiveness model

|                                                       | Value (95% CI)        | Distribution | Reference |
|-------------------------------------------------------|-----------------------|--------------|-----------|
| <b>Utilities</b>                                      |                       |              |           |
| Index VTE                                             |                       |              |           |
| 0–1 month                                             | 0.565 (0.501 – 0.620) | Beta         | [1]       |
| 1–2 months                                            | 0.655 (0.585 – 0.713) | Beta         | [1]       |
| 2–3 months                                            | 0.674 (0.606 – 0.729) | Beta         | [1]       |
| 3–4 months                                            | 0.698 (0.635 – 0.750) | Beta         | [1]       |
| 4–5 months                                            | 0.707 (0.645 – 0.758) | Beta         | [1]       |
| Baseline utility 6 months after index VTE             | 0.715 (0.646 – 0.770) | Beta         | [1]       |
| Recurrent VTE                                         |                       |              |           |
| DVT                                                   | 0.605 (0.514 – 0.678) | Beta         | [1]       |
| Non-fatal symptomatic PE                              | 0.621 (0.477 – 0.725) | Beta         | [1]       |
| Non-fatal incidental PE                               | 0.664 (0.615 – 0.707) | Beta         | [1]       |
| Non-ICH MB                                            | 0.593 (0.461 – 0.693) | Beta         | [1]       |
| CRNMB                                                 | 0.622 (0.568 – 0.669) | Beta         | [1]       |
| <b>Utility decrements</b>                             |                       |              |           |
| Recurrent VTE within first six months after index VTE |                       |              |           |
| DVT                                                   | 0.040 (0.000 – 0.158) | Beta         | [1]       |
| Symptomatic PE                                        | 0.024 (0.000 – 0.195) | Beta         | [1]       |
| Incidental PE                                         | 0.189 (0.021 – 0.404) | Beta         | [1]       |
| ICH                                                   | 0.380 (0.285 – 0.475) | Beta         | [2]       |
| Severe PTS (<6 months after diagnosis)                | 0.186 (0.090 – 0.280) | Beta         | [1]       |
| Severe PTS (>6 months after diagnosis)                | 0.070 (0.053 – 0.088) | Beta         | [2]       |
| CTEPH                                                 |                       |              |           |
| 0-1 year                                              | 0.194 (0.071 – 0.303) | Beta         | [3]       |
| 1–4 years                                             | 0.109 (0.000 – 0.244) | Beta         | [3]       |
| 4–5 years                                             | 0.079 (0.000 – 0.277) | Beta         | [3]       |

Abbreviations: CI, confidence interval; CRNMB, clinically relevant non-major bleeding; CTEPH, chronic thromboembolic pulmonary hypertension; DVT, deep vein thrombosis; ICH, intracranial haemorrhage; MB, major bleeding; PE, pulmonary embolism; PTS, post-thrombotic syndrome; VTE, venous thromboembolism

## References

- Lloyd AJ, Dewilde S, Noble S, Reimer E, Lee AYY. What Impact Does Venous Thromboembolism and Bleeding Have on Cancer Patients' Quality of Life? *Value Heal*. 2018;21(4):449–55.
- Stevanović J, de Jong LA, Kappelhoff BS, Dvortsin EP, Voorhaar M, Postma MJ. Dabigatran for the Treatment and Secondary Prevention of Venous Thromboembolism; A Cost-Effectiveness Analysis for the Netherlands. *PLoS One*. 2016;11(10):e0163550.
- Roman A, Barbera JA, Castillo MJ, Muñoz R, Escribano P. Health-related quality of life in a national cohort of patients with pulmonary arterial hypertension or chronic thromboembolic pulmonary hypertension. *Arch Bronconeumol*. 2013;49(5):181–8.

## Supplementary data file – Figure S1

**Manuscript title:** Cost-effectiveness analysis and budget impact of rivaroxaban in cancer patients at risk of recurrent venous thromboembolism

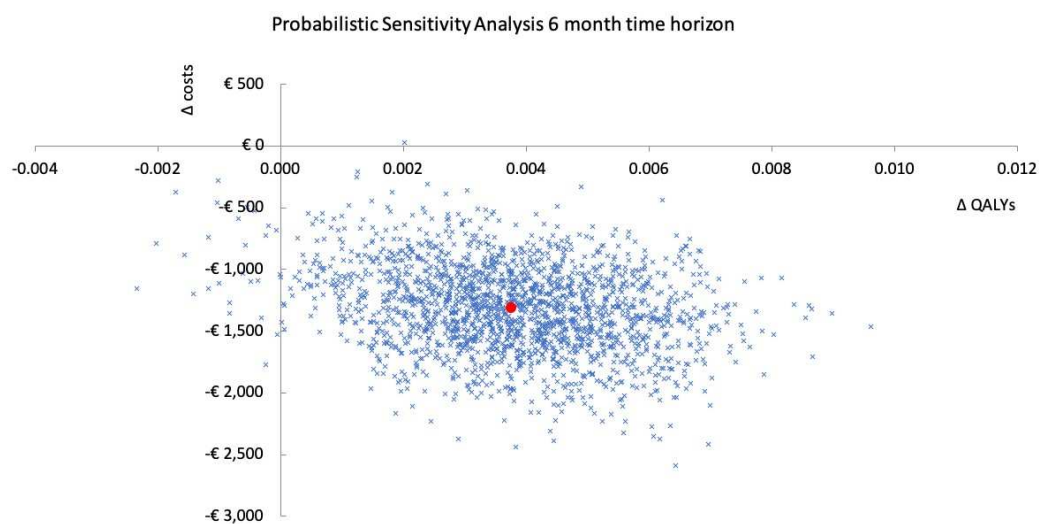

**Figure S1. Probabilistic sensitivity analysis with six-month time horizon (scenario 1).** The red mark represents the deterministic incremental cost-effectiveness ratio. Abbreviation: QALY, quality adjusted life-year

## Supplementary data file – Figure S2

**Manuscript title:** Cost-effectiveness analysis and budget impact of rivaroxaban in cancer patients at risk of recurrent venous thromboembolism

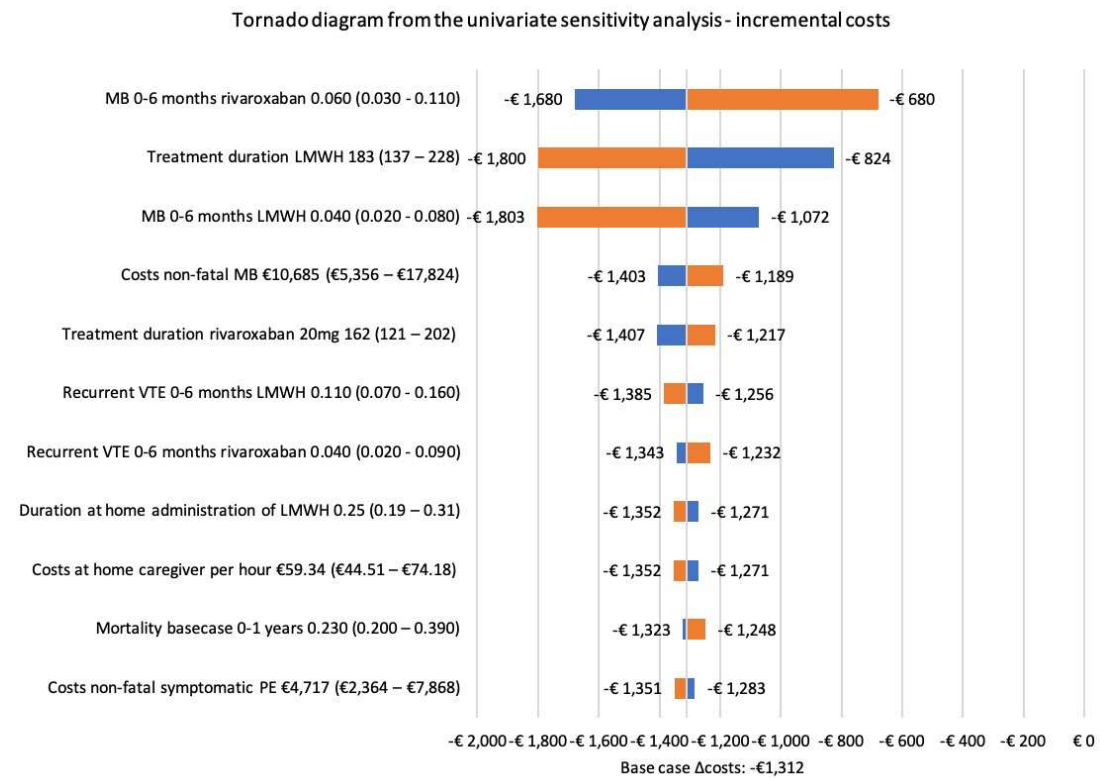

**Figure S2. Tornado diagram from the univariate sensitivity analysis for scenario 1 showing the impact of parameters on the incremental costs.** Abbreviations: MB, major bleeding; PE, pulmonary embolism; VTE, venous thromboembolism

## Supplementary data file – Figure S3

**Manuscript title:** Cost-effectiveness analysis and budget impact of rivaroxaban in cancer patients at risk of recurrent venous thromboembolism

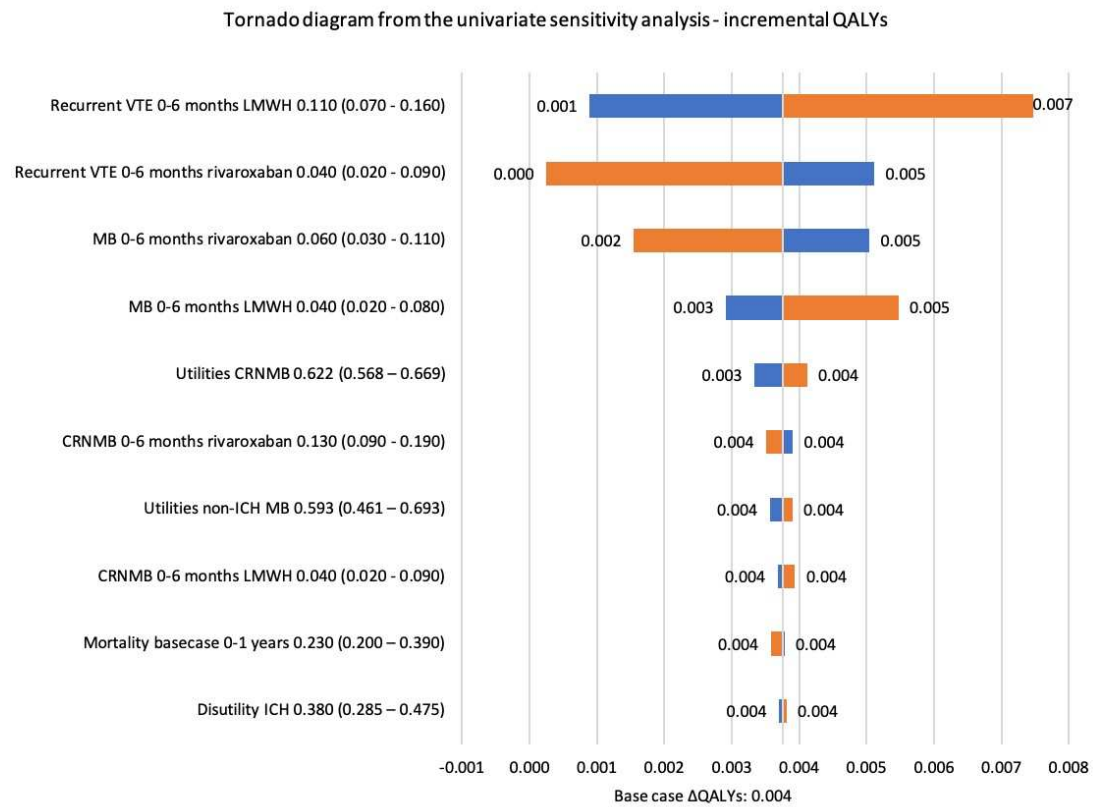

**Figure S3.** Tornado diagram from the univariate sensitivity analysis for scenario 1 showing the impact of parameters on the incremental QALYs. Abbreviations: CRNMB, clinically relevant non-major bleeding; ICH, intracranial haemorrhage; MB, major bleeding; PE, pulmonary embolism; VTE, venous thromboembolism
